# Supplementary material for: Bi-compartmental elderly or adult dynamic digestion models applied to interrogate protein digestibility
Source: Royal Society of Chemistry journal article supplement (doi:10.1039/c4fo00478g), 2014-01-01
Supplement: c4fo00478g1.pdf [file c4fo00478g1.pdf]

## 1 Supplementary: computer programming of the bi-compartmental elderly or 2 adult dynamic digestion models and further supporting results

---

3 Carmit Shani Levi<sup>a</sup>, and Uri Lesmes<sup>a, \*</sup>.

4 Development and application of *in vitro* digestion models has become a vivid field of research. To  
5 this end, increasing accessibility, method harmonization and model validation have become of great  
6 importance<sup>1, 2</sup>. Within such efforts, this research attempts to bring forward readily and highly bio-  
7 relevant models based on commercially available equipment and software. This supplementary  
8 material describes in detail the development of the software used to control the bioreactors and to  
9 provide additional evidence on the ability of the models to detect differences in protein breakdown.

10 **Computer programming and mathematical definitions.** To enable bio-relevant mirroring of the  
11 dynamic characteristics of gastro-duodenal digestion, "*BioXpert*" software was programmed. This  
12 supplementary material depicts the programming procedures of the adult model, which can be easily  
13 modified to the elderly models through adjusting the numeric values within the procedures. The set  
14 of procedures programmed to control V1 was intended to recreate the gastric mixing pattern, pH  
15 gradient and gastric emptying, as described in **Table 1** of the paper. Due to the reported contractile  
16 nature of the stomach<sup>3</sup>, the stirrer of the gastric bioreactor was programmed to operate through the  
17 following procedure:

```
18 IF stirrer=0  
19 Stirrer=200  
20 ELSE  
21 Stirrer=0  
22 ENDIF
```

23  
24 This programming enabled achieving an average mixing profile of one to two mixing events of 200  
25 RPM per min which concurs with the gastric contractions measured *in vivo*<sup>4, 5</sup>. Post-prandial gastric

26 pH gradient measured in healthy adults<sup>6</sup> was introduced into the software through a series of set  
27 points defining time and pH during the experiment, as described in **Table I**. Gastric emptying was  
28 programmed through the following program procedure:

```
29 IF TIME>=5  
30 A =2-0.0463386*power(TIME,0.7)  
31 B =power(2,A)  
32 C =0.562091*B  
33 pace =C/power(TIME,0.3)  
34 pump4 =pace/0.07487  
35 ELSE  
36 Pump4=0  
37 ENDIF  
38
```

39 The program was also designed to control V2 for two major digestive constituents: digesta  
40 neutralization and bile secretion, as described in detail in **Table 1** of the paper. Bile secretion has  
41 been reported to be gradual in healthy adults ingesting a liquid meal, with two distinct rates of  
42 secretion: first rapid secretion for 5 min from the beginning of the meal, i.e. at the beginning of  
43 gastric emptying, followed by a moderate secretion<sup>7, 8</sup>. The control program designed in the study  
44 accounted for such dynamics of bile secretion through the following procedure:

```
45 IF TIME<=13 AND TIME>8  
46 pace =0.061  
47 pump4 =pace*100  
48 ENDIF  
49 IF TIME>13  
50 Pace =0.003  
51 Pump4 =pace*100  
52 ENDIF
```

### 53 **Implementation of the bi-compartmental models to probe protein digestibility**

54 Once the *in vitro* adult and elderly models were set up, the proteolytic breakdown of whey  
55 protein isolate, as a realistic product, was evaluated and outcomes of adult and elderly digestion  
56 experiments are presented in **Figure 1** herein. This qualitative SDS-PAGE analysis demonstrated  
57 that the semi-continuity of the bi-compartmental model enabled portions of intact whey proteins to

58 be introduced into the duodenum. This is believed to be a more realistic representation of digestion  
59 than batch models in which gastric emptying is unaccounted for and therefore duodenal digestion is  
60 routinely performed on fully digested samples. A similar observation was made in the corresponding  
61 elderly model (**Figure 1B**). Overall, these findings yielded more bio-relevant results, yet, this model  
62 focused solely on protein breakdown. Thus, it could be further improved, based on the additional  
63 information provided herein. Specifically, accounting for amylolytic and lipolytic activity in the  
64 stomach and duodenum of adults and the elderly could be applied based on the gathered information.

## 65 **Materials**

66 Food grade whey protein isolate (WPI) (K-PRO 1050, 80% protein) was kindly donated by  
67 BA`EMEK Advanced Technologies Ltd. (Afula, Israel). All other materials and methods are  
68 described in the paper.

69

70

71

## 72 References

- 73 1. Guerra, A.; Etienne-Mesmin, L.; Livrelli, V., et al., Relevance and challenges in  
74 modeling human gastric and small intestinal digestion. *Trends Biotechnol.*, **2012**, 30, (11),  
75 591-600.
- 76 2. Minekus, M.; Alminger, M.; Alvito, P., et al., A standardised static in vitro digestion  
77 method suitable for food - an international consensus. *Food & Function*, **2014**.
- 78 3. Lentle, R. G.; Janssen, P. W. M., *Physical Processes of Digestion*. Springer, 233  
79 Spring Street, New York, Ny 10013, United States: 2011; p 1.
- 80 4. Lentle, R. G.; Janssen, P. W. M.; Goh, K., et al., Quantification of the Effects of the  
81 Volume and Viscosity of Gastric Contents on Antral and Fundic Activity in the Rat Stomach  
82 Maintained Ex Vivo. *Dig. Dis. Sci.*, **2010**, 55, (12), 3349-3360.
- 83 5. Angeli, T. R.; Du, P.; Paskaranandavivel, N., et al., The bioelectrical basis and  
84 validity of gastrointestinal extracellular slow wave recordings. *J. Physiol.-London*, **2013**,  
85 591, (18), 4567-4579.
- 86 6. Russell, T. L.; Berardi, R. R.; Barnett, J. L., et al., UPPER GASTROINTESTINAL PH  
87 IN 79 HEALTHY, ELDERLY, NORTH-AMERICAN MEN AND WOMEN. *Pharmaceutical*  
88 *Research*, **1993**, 10, (2), 187-196.
- 89 7. Laugier, R.; Bernard, J. P.; Berthezene, P., et al., CHANGES IN PANCREATIC  
90 EXOCRINE SECRETION WITH AGE - PANCREATIC EXOCRINE SECRETION DOES  
91 DECREASE IN THE ELDERLY. *Digestion*, **1991**, 50, (3-4), 202-211.
- 92 8. Di Francesco, V.; Zamboni, M.; Dioli, A., et al., Delayed postprandial gastric  
93 emptying and impaired gallbladder contraction together with elevated cholecystokinin and  
94 peptide YY serum levels sustain satiety and inhibit hunger in healthy elderly persons.  
95 *Journals of Gerontology Series a-Biological Sciences and Medical Sciences*, **2005**, 60, (12),  
96 1581-1585.

97

98

99 **List of Tables and Figures**

100

101 **Table I.** Definition of set points used to generate adult or elderly gastric pH profiles.

102

| Adult pH set points |          | Elderly pH set points |          |
|---------------------|----------|-----------------------|----------|
| Time [hr]           | pH value | Time [hr]             | pH value |
| 0:00                | 4.5      | 0:00                  | 6.2      |
| 0:05                | 3.9      | 0:30                  | 5.0      |
| 0:09                | 3.4      | 1:00                  | 4.5      |
| 0:10                | 3.2      | 1:30                  | 4.0      |
| 0:15                | 3.0      | 2:00                  | 3.6      |
| 0:20                | 2.8      | 2:30                  | 3.2      |
| 0:40                | 1.8      | 2:40                  | 3.0      |
| 1:00                | 1.7      | 2:45                  | 3.0      |
| 2:00                | 1.5      | 2:50                  | 3.0      |
|                     |          | 2:55                  | 2.0      |
|                     |          | 3:00                  | 2.0      |

103

104 **Figure 1.** SDS-PAGE analyses of WPI digesta collected during simulated digestion under (A) adult

105 and (B) elderly conditions.

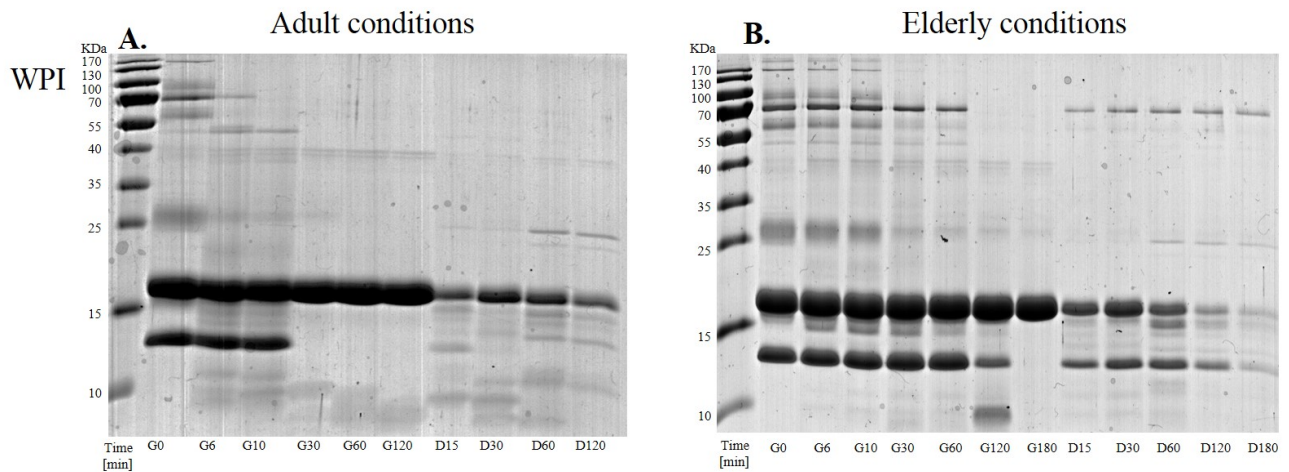

106

107
